# Supplementary material for: A large-scale comparison of human-written versus ChatGPT-generated essays
Source: PubMed Central journal article supplement (PMC10616290; doi:10.1038/s41598-023-45644-9), 2023-10-30
Supplement: 41598_2023_45644_MOESM4_ESM.pdf [file 41598_2023_45644_MOESM4_ESM.pdf]

### S3 Details about the variables collected within the questionnaire

**Supplementary Table 1.** Skill levels for self-assessment for reading proficiency, their CEFR equivalents, and the score on the underlying Likert scale.

| Self-assessment              | CEFR | Score |
|------------------------------|------|-------|
| Comparable to native speaker | C2   | 5     |
| Business fluent              | C1   | 4     |
| Fluent                       | B2   | 3     |
| Good                         | B1   | 2     |
| Good basic skills            | A2   | 1     |
| Some basic skills            | A1   | 0     |

**Supplementary Table 2.** Scale for the self-assessment of the confidence in the essay ratings.

| Self-assessment of rating confidence                                                      | Score |
|-------------------------------------------------------------------------------------------|-------|
| I am certain that my assessment is correct.                                               | 4     |
| I am fairly certain that my assessment is correct.                                        | 3     |
| I am fairly certain that my assessment is correct, but I may have misjudged some aspects. | 2     |
| I would defend my assessment, but it is possible that I misjudged aspects.                | 1     |
| I am not familiar with the topic. My assessment is based on guesses.                      | 0     |

**Supplementary Table 3.** Categories and levels for the rating of the essays.

| Category                             | Description of levels from best to worst                                                               | Score |
|--------------------------------------|--------------------------------------------------------------------------------------------------------|-------|
| Topic and completeness               | Addressed the topic to a special degree and considered all aspects of the task.                        | 6     |
|                                      | Addressed the topic in a good manner and considered all aspects of the task.                           | 5     |
|                                      | Addressed the topic and considered most aspects of the task.                                           | 4     |
|                                      | Mostly addressed the topic, considered only some aspects of the task.                                  | 3     |
|                                      | Topic still discernable, superficial and one-sided, of digresses and repeats itself.                   | 2     |
|                                      | Topic somewhat discernable, every superficial and one-sided.                                           | 1     |
|                                      | No relation to the topic.                                                                              | 0     |
| Logic and composition                | Clear structure and logical and profound reasoning.                                                    | 6     |
|                                      | Logical and consistent structure, sound reasoning.                                                     | 5     |
|                                      | Mostly logical structure, sometimes chains of individual thoughts.                                     | 4     |
|                                      | Errors in the logical structure, thoughts not presented coherently.                                    | 3     |
|                                      | Logical structure recognizable, jumps in reasoning.                                                    | 2     |
|                                      | Logical structure recognizable, few thoughts brought to a conclusion.                                  | 1     |
|                                      | No logical structure.                                                                                  | 0     |
| Expressiveness and comprehensiveness | Very comprehensive and detailed depiction, consistently persuasive.                                    | 6     |
|                                      | Comprehensive and detailed depiction.                                                                  | 5     |
|                                      | Partially detailed and mostly comprehensive.                                                           | 4     |
|                                      | Few details, but still comprehensive.                                                                  | 3     |
|                                      | Somewhat comprehensive.                                                                                | 2     |
|                                      | Almost not comprehensive.                                                                              | 1     |
|                                      | Not comprehensive.                                                                                     | 0     |
| Language mastery                     | Almost perfect language use, few minor rule violations that do not influence the understandability.    | 6     |
|                                      | Some minor rule violations that do not have a major influence on the understandability.                | 5     |
|                                      | Some rule violations that affect the understandability.                                                | 4     |
|                                      | Multiple rule violations that affect the understandability.                                            | 3     |
|                                      | Many rule violations that affect the understandability.                                                | 2     |
|                                      | Many severe rule violations that affect the understandability.                                         | 1     |
|                                      | Unintelligible language use.                                                                           | 0     |
| Complexity                           | Often uses complex sentences and sentence links.                                                       | 6     |
|                                      | Multiple uses complex sentences and sentence links.                                                    | 5     |
|                                      | Few uses of complex sentences, but multiple simple sentence links.                                     | 4     |
|                                      | Consistently simple but correct sentence structures, some sentence links.                              | 3     |
|                                      | Lack of complex language, errors in sentence structures, few sentence links.                           | 2     |
|                                      | Severe errors in sentence structures, no sentence links.                                               | 1     |
|                                      | No discernable sentence structures.                                                                    | 0     |
| Vocabulary and text linking          | Very comprehensive and variable use of vocabulary and consistent and correct linking of text elements. | 6     |
|                                      | Comprehensive and variable use of vocabulary, often correct linking of text elements.                  | 5     |
|                                      | Fundamental vocabulary, sometimes correct linking of text elements.                                    | 4     |
|                                      | Limited vocabulary, rudimentary linking of text elements.                                              | 3     |
|                                      | Limited vocabulary, sometimes bad choice of words, no linking of text elements.                        | 2     |
|                                      | Strongly limited vocabulary, often bad choice of words, no linking of text elements.                   | 1     |
|                                      | No consistent English vocabulary.                                                                      | 0     |
| Language constructs                  | Confident use of a large number of language constructs.                                                | 6     |
|                                      | Confident use of language constructs.                                                                  | 5     |
|                                      | Mostly correct use of language constructs.                                                             | 4     |
|                                      | Only few language constructs and partially wrong use.                                                  | 3     |
|                                      | Predominantly wrong use of language constructs.                                                        | 2     |
|                                      | Almost always wrong use of language constructs.                                                        | 1     |
|                                      | Language constructs not following English language rules.                                              | 0     |
