# Supplementary material for: A large-scale comparison of human-written versus ChatGPT-generated essays
Source: PubMed Central journal article supplement (PMC10616290; doi:10.1038/s41598-023-45644-9), 2023-10-30
Supplement: 41598_2023_45644_MOESM5_ESM.pdf [file 41598_2023_45644_MOESM5_ESM.pdf]

## S4 Supporting visualizations for the data analysis

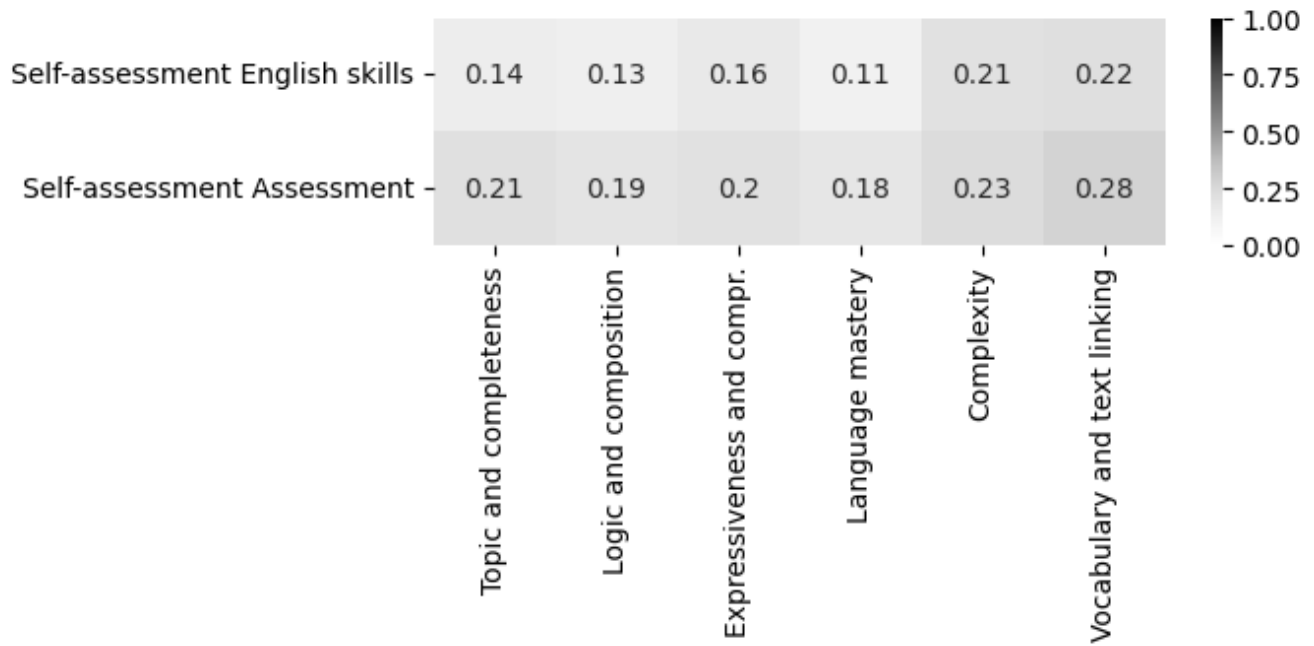

**Supplementary Figure 1.** Pearson's  $r$  correlation between the self-assessments. All correlations are significant.

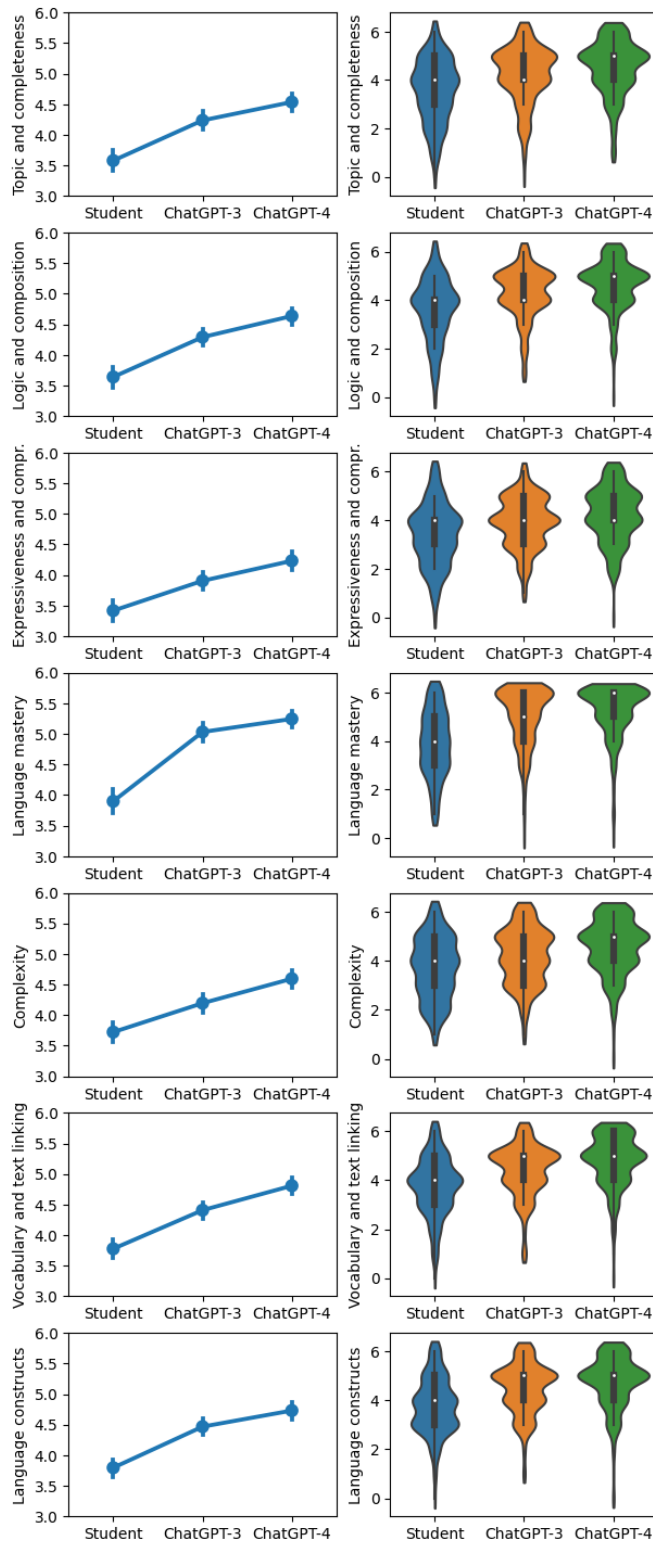

**Supplementary Figure 2.** Left: Point plots depicting the mean values and confidence intervals of the survey results. Right: Violin plots depicting the distribution of the ratings.

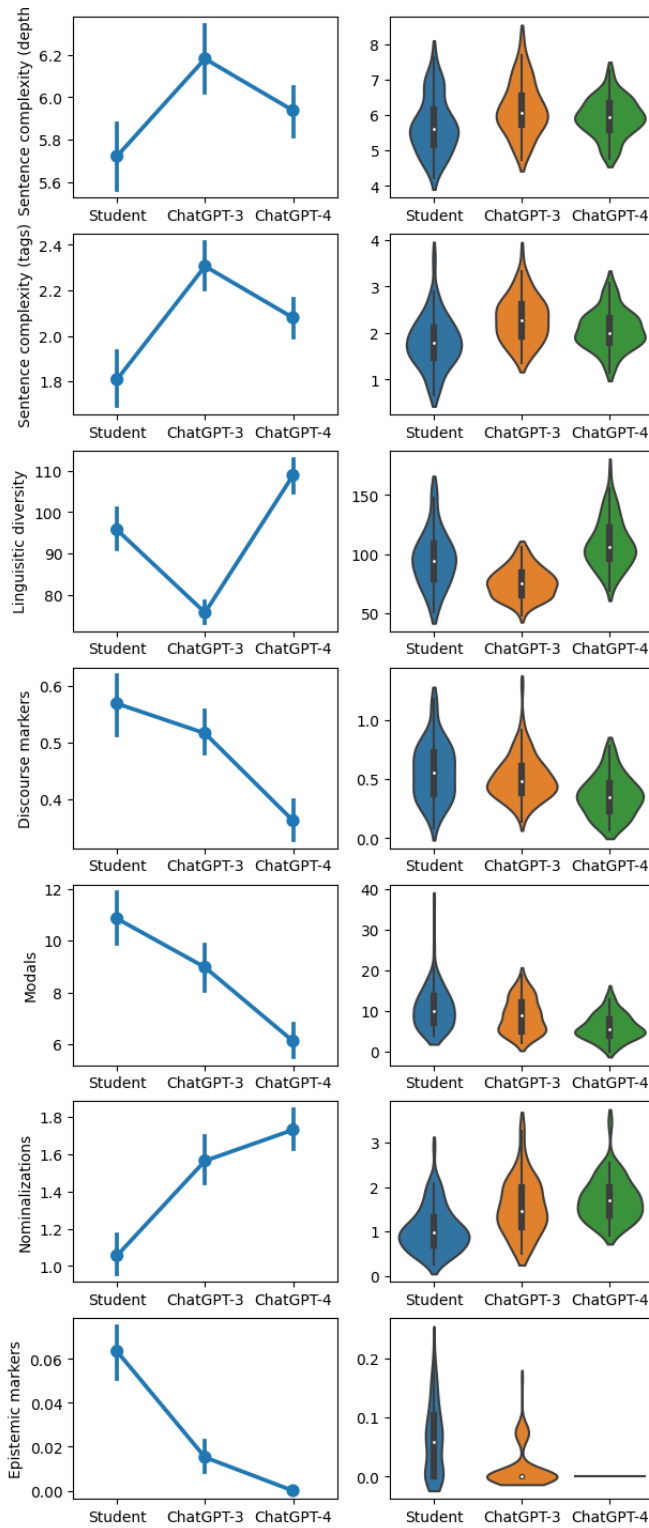

**Supplementary Figure 3.** Left: Point plots depicting the mean values and confidence intervals of the linguistic characteristics. Right: Violin plots depicting the distribution of the linguistic characteristics.
